# Supplementary material
Source: Springer Nature journal article supplement (https://www.springermedizin.de/resource/supplementary/12984_2006_114_MOESM6_ESM.pdf/9605336)
Supplement: MOESM6 [file 9605336]

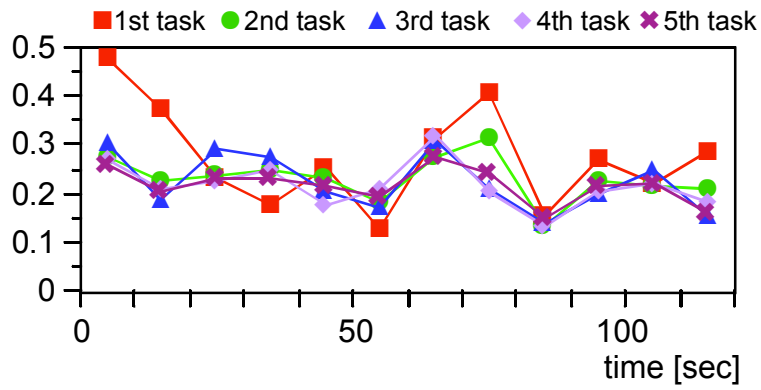

Fig. 6. Time- distribution of  $\gamma_{GMV-eye}$  at 10-s segment for virtual 2-min-long vection induced video image. Lines show the averaged  $\gamma_{GMV-eye}$  of each task for the unpleasant group.
